# Supplementary material for: Predictors of postoperative acute exacerbation of interstitial lung disease: a case–control study
Source: HighWire-hosted journal article supplement (doi:10.1136/bmjresp-2020-000634), 2020-10-01
Supplement: bmjresp-2020-000634supp002_data_supplement.pdf [file bmjresp-2020-000634supp002_data_supplement.pdf]

**Online supplemental table 1 (S1–S4)**

**Supplemental Table S1: Etiologies of ILD and types of surgery among 700 patients  
in this case–control study**

| Etiology of ILD or type of surgery |                                                           | Number (%) of patients |
|------------------------------------|-----------------------------------------------------------|------------------------|
|                                    |                                                           | total                  |
|                                    |                                                           | 700 (100)              |
| Etiology of ILD                    | Idiopathic interstitial pneumonia                         | 416 (59)               |
|                                    | Connective tissue diseases                                | 237 (34)               |
|                                    | Rheumatoid arthritis                                      | 105                    |
|                                    | Systemic sclerosis                                        | 32                     |
|                                    | Polymyositis/Dermatomyositis                              | 29                     |
|                                    | Antineutrophil cytoplasmic antibody associated vasculitis | 11                     |
|                                    | Systemic lupus erythematosus                              | 11                     |
|                                    | Sjögren syndrome                                          | 8                      |
|                                    | Multiple                                                  | 29                     |
|                                    | Others                                                    | 12                     |
|                                    | Drug*                                                     | 15 (2.1)               |
|                                    | Pneumoconiosis                                            | 13 (1.9)               |
|                                    | Radiation                                                 | 12 (1.7)               |
|                                    | Hypersensitivity pneumonitis                              | 7 (1.0)                |
| Type of surgery                    | Orthopedic                                                | 151 (22)               |
|                                    | Lung                                                      | 140 (20)               |
|                                    | Digestive tract                                           | 136 (19)               |
|                                    | Hepato-pancreatic-biliary or splenic                      | 54 (7.7)               |
|                                    | Urinary                                                   | 46 (6.6)               |
|                                    | Aortic or vascular                                        | 43 (6.1)               |
|                                    | Ear, nose, and throat, or oral                            | 39 (5.6)               |
|                                    | Cardiac                                                   | 27 (3.9)               |
|                                    | Obstetric and gynecologic                                 | 18 (2.6)               |
|                                    | Neurosurgery                                              | 15 (2.1)               |
|                                    | Breast                                                    | 9 (1.3)                |
|                                    | Mediastinal                                               | 8 (1.1)                |
|                                    | Thyroid                                                   | 7 (1.0)                |
|                                    | Skin                                                      | 6 (0.9)                |
|                                    | Others                                                    | 1 (0.1)                |

\* Four patients with drug-induced ILD also had connective tissue diseases.

ILD, interstitial lung disease.

**Supplemental Table S2: Numerical variables used for one-to-four case-control****matching or multiple imputation**

| Factor                                   | Total<br>n = 700            | AE<br>n = 28                | Before matching             |                       | After 1:4 matching         |                       |
|------------------------------------------|-----------------------------|-----------------------------|-----------------------------|-----------------------|----------------------------|-----------------------|
|                                          |                             |                             | non-AE<br>n = 672           | <i>P</i> <sup>†</sup> | non-AE<br>n = 112          | <i>P</i> <sup>†</sup> |
| Age (years), mean (SD)                   | 70.1 (10.7)                 | 72.4 (10.6)                 | 70.0 (10.7)                 | 0.242                 | 68.6 (11.8)                | 0.115                 |
| Per cent predicted FVC (%),<br>mean (SD) | n = 670<br>86.3 (18.6)      | n = 26<br>75.5 (17.9)       | n = 644<br>86.8 (18.5)      | 0.002                 | n = 107<br>87.2 (19.4)     | 0.006                 |
| FEV <sub>1</sub> /FVC, mean (SD)         | n = 670<br>0.76 (0.10)      | n = 26<br>0.77 (0.07)       | n = 644<br>0.76 (0.10)      | 0.557                 | n = 107<br>0.77 (0.10)     | 0.969                 |
| Hb (g/dL), mean (SD)                     | 12.0 (1.9)                  | 11.6 (2.0)                  | 12.0 (1.9)                  | 0.271                 | 12.4 (2.0)                 | 0.044                 |
| LD (IU/L), median (IQR)                  | 213<br>(183–251)            | 214<br>(194–261)            | 213<br>(183–249)            | 0.344                 | 211<br>(180–247)           | 0.273                 |
| CRP (mg/dL), median (IQR)                | 0.23<br>(0.08–0.76)         | 0.41<br>(0.18–1.95)         | 0.22<br>(0.08–0.72)         | 0.02                  | 0.16<br>(0.06–0.57)        | 0.005                 |
| KL-6 (U/mL), median (IQR)                | n = 497<br>421<br>(264–682) | n = 23<br>799<br>(358–1147) | n = 474<br>417<br>(260–665) | 0.01                  | n = 82<br>524<br>(257–802) | 0.108                 |
| ARISCAT total score,<br>mean (SD)        | 32 (17)                     | 52 (16)                     | 32 (17)                     | < 0.001               | 35 (17)                    | < 0.001               |

AE, acute exacerbation; FVC, forced vital capacity; FEV<sub>1</sub>, forced expiratory volume in

1 second; Hb, hemoglobin; LD, lactate dehydrogenase; CRP, C-reactive protein;

ARISCAT, Assess Respiratory Risk in Surgical Patients in Catalonia; SD, standard

deviation; IQR, interquartile range.

† All characteristics were compared between cases and controls. Patients with missing

data were excluded. The analyses were conducted using Student's *t*-test or the Mann–

Whitney *U* test.

**Supplemental Table S3: Evaluation of multicollinearity using generalized variance-inflation factors**

$GVIF^{(1/2df)} > 2$  suggests multicollinearity. No multicollinearity was found in the independent variables included in the multivariable logistic regression model.

|                             | GVIF | $GVIF^{(1/2df)}$ |
|-----------------------------|------|------------------|
| Honeycombing on CT          | 1.12 | 1.06             |
| Per cent predicted FVC <80% | 1.14 | 1.07             |
| ARISCAT score category      | 1.10 | 1.02             |

GVIF, generalized variance-inflation factor; df, degrees of freedom; FVC, forced vital capacity; ARISCAT, Assess Respiratory Risk in Surgical Patients in Catalonia.

**Supplemental Table S4: H-F-A index**

The H-F-A index score was defined as the cumulative total of the following positive predictors: honeycombing on CT (H), per cent predicted forced vital capacity <80% (F), and ARISCAT score  $\geq$ 45 (A).

**A) Number of patients with ILD for each cumulative total of H-F-A index score**

| Number of<br>positive predictors<br>(H-F-A index score) | Number of<br>patients<br>n = 700 | Number of<br>postoperative AE<br>n = 28 | Rate of<br>postoperative AE<br>(%) |
|---------------------------------------------------------|----------------------------------|-----------------------------------------|------------------------------------|
| 0                                                       | 238                              | 0                                       | 0                                  |
| 1                                                       | 291                              | 7                                       | 2.4                                |
| 2                                                       | 141                              | 13                                      | 9.2                                |
| 3                                                       | 30                               | 8                                       | 27                                 |

ILD, interstitial lung disease; AE, acute exacerbation; CT, computed tomography;

ARISCAT, Assess Respiratory Risk in Surgical Patients in Catalonia.

**B) Sensitivity and specificity of each cut-off value in the cumulative H-F-A index score for predicting postoperative acute exacerbation (n = 700)**

The Cochran–Mantel–Haenszel test was used to estimate the sensitivity and specificity of each cut-off value in the H-F-A index score.

| Cut-off number | Sensitivity (95% CIs) | Specificity (95% CIs) |
|----------------|-----------------------|-----------------------|
| 1              | 1 (0.82–1.00)         | 0.35 (0.32–0.39)      |
| 2              | 0.75 (0.55–0.89)      | 0.78 (0.74–0.81)      |
| 3              | 0.27 (0.12–0.46)      | 0.97 (0.95–0.98)      |

CI, confidence interval.
