# Supplementary figures and images for: Predictors of postoperative acute exacerbation of interstitial lung disease: a case–control study
Source: HighWire-hosted journal article supplement (doi:10.1136/bmjresp-2020-000634), 2020-10-01

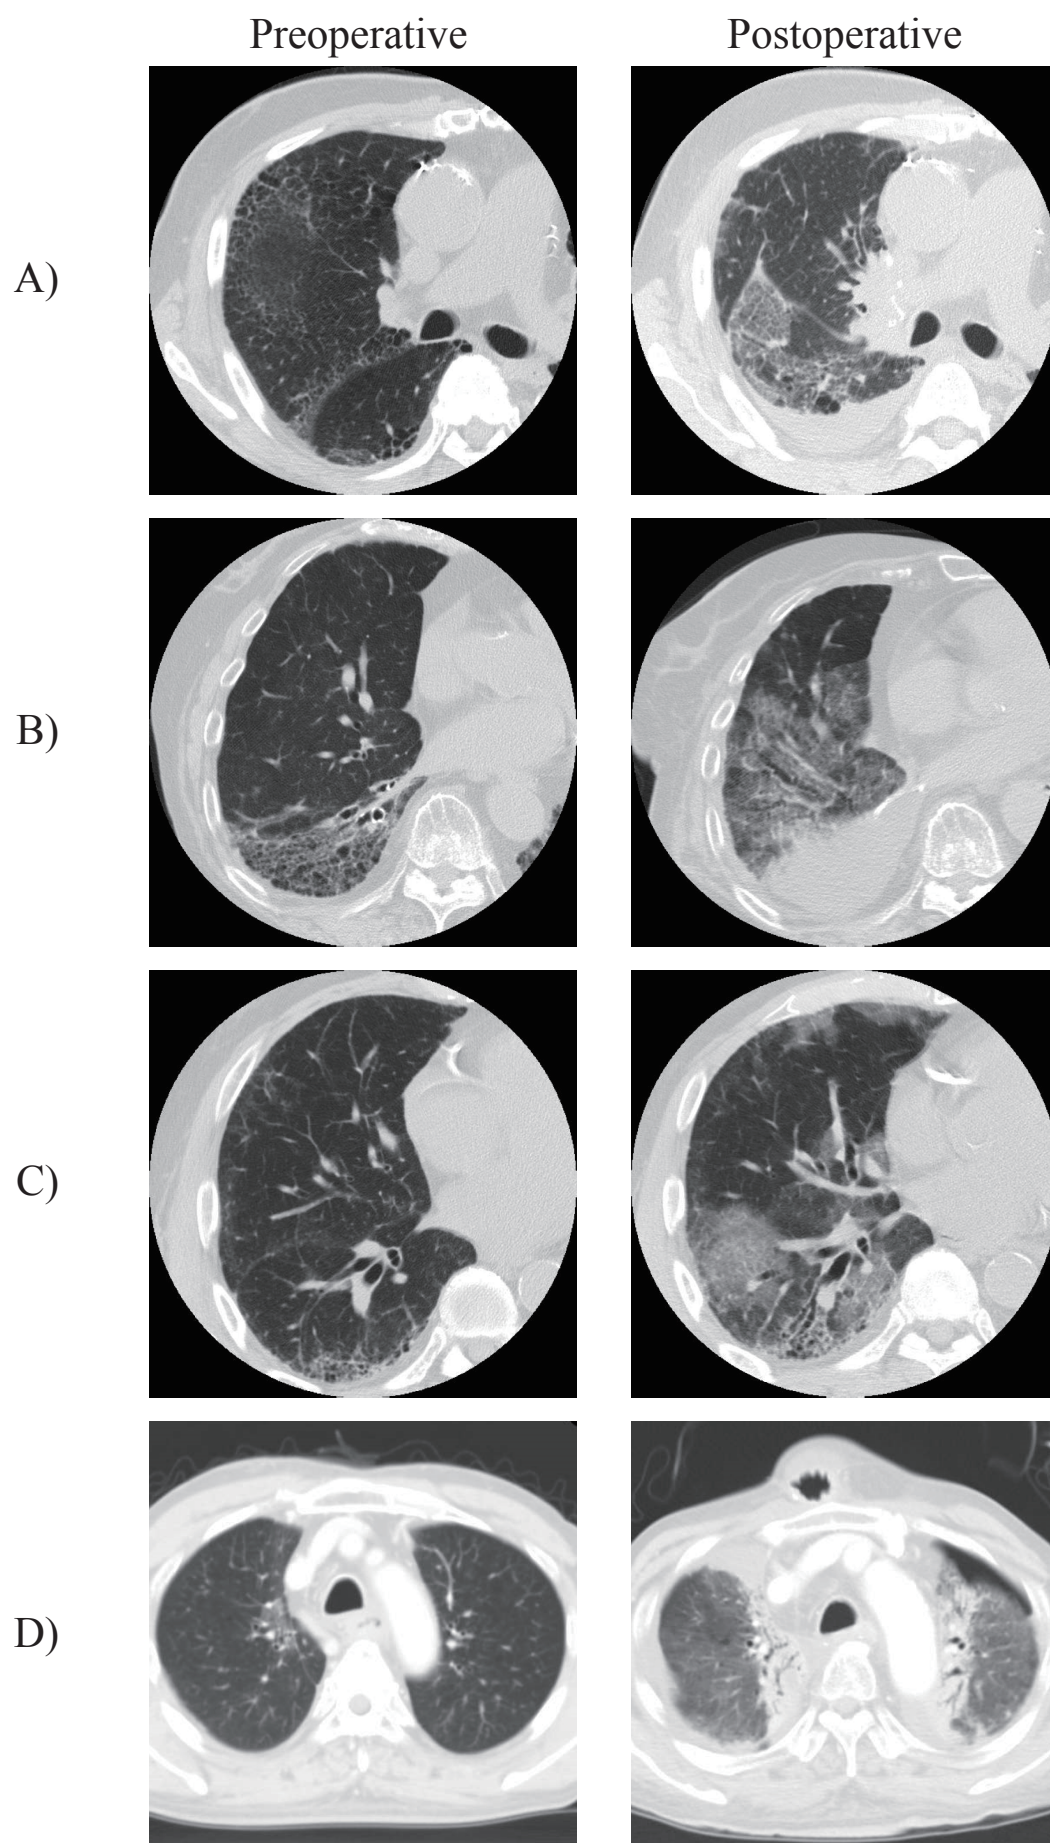

Supplement: bmjresp-2020-000634supp001_data_supplement.pdf [file bmjresp-2020-000634supp001_data_supplement.pdf]

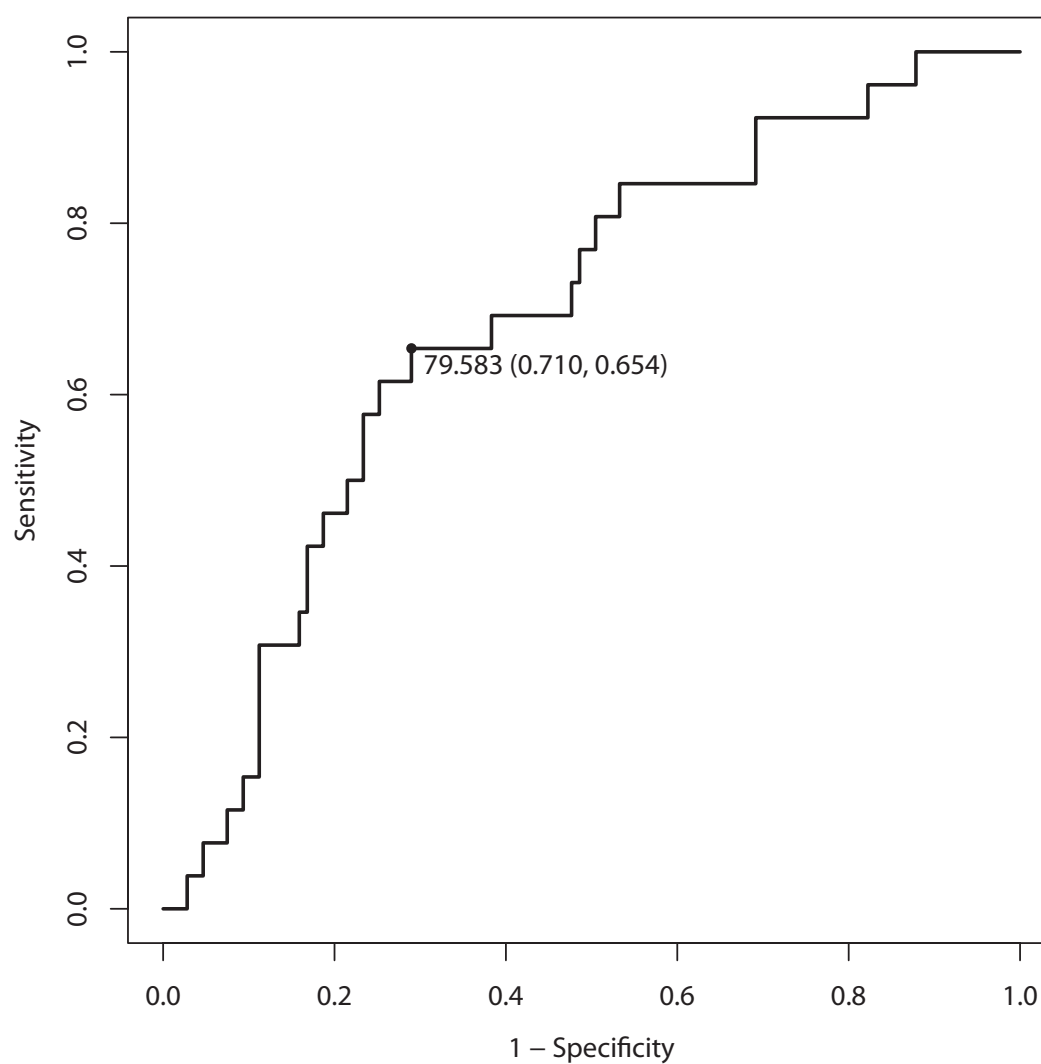

Supplement: bmjresp-2020-000634supp004_data_supplement.pdf [file bmjresp-2020-000634supp004_data_supplement.pdf]
